# Supplementary material for: Single-Molecule Telomere Assay via Optical Mapping (SMTA-OM) Can Potentially Define the ALT Positivity of Cancer
Source: MDPI journal article supplement (doi:10.3390/genes14061278), 2023-06-16
Supplement: s1 [file s1]

U2OS

| A   | B       | C       | D       | E       | F   | G           | H      | I             | J           | K            | L      | M      | N     | O      | P    | Q     | R     | S      | T      | U      | V      |
|-----|---------|---------|---------|---------|-----|-------------|--------|---------------|-------------|--------------|--------|--------|-------|--------|------|-------|-------|--------|--------|--------|--------|
| Chr | Overall | Overall | Overall | Overall |     | EndTel % (- | EndTel | EndTel Counts | EndTel Mean | EndTel STDev | EndTel | TFE    |       | ITS    | ITS  | ITS   |       | ITS+   |        | ITS-   |        |
| arm | counts  | Mean    | STD     | Max     | CV  | TFE)        | Counts | (-TFE)        | (-TFE)      | (-TFE)       | Max    | counts | TFE % | Counts | Mean | STDev | ITS % | counts | ITS+ % | counts | ITS- % |
| 1p  | 24      | 2.40    | 2.6     | 7.4     | 1.1 | 58.3        | 15     | 14            | 2.9         | 2.2          | 6.2    | 1      | 4.2   | 9      | 1.9  | 3.2   | 37.5  | 4      | 16.7   | 5      | 20.8   |
| 1q  | 29      | 1.19    | 2.2     | 9.4     | 1.9 | 20.7        | 7      | 6             | 4.0         | 3.9          | 9.4    | 1      | 3.4   | 22     | 0.5  | 0.6   | 75.9  | 18     | 62.1   | 4      | 13.8   |
| 2p  | 20      | 2.34    | 3.0     | 10.7    | 1.3 | 60.0        | 14     | 12            | 2.5         | 2.5          | 7.0    | 2      | 10.0  | 6      | 2.9  | 4.3   | 30.0  | 4      | 20.0   | 2      | 10.0   |
| 2q  | 38      | 5.08    | 5.6     | 23.8    | 1.1 | 92.1        | 35     | 35            | 5.5         | 5.7          | 23.8   | 0      | 0.0   | 3      | 0.4  | 0.6   | 7.9   | 1      | 2.6    | 2      | 5.3    |
| 3p  | 23      | 5.50    | 7.4     | 35.8    | 1.3 | 69.6        | 16     | 16            | 6.6         | 8.4          | 35.8   | 0      | 0.0   | 7      | 2.9  | 3.8   | 30.4  | 7      | 30.4   | 0      | 0.0    |
| 3q  | 23      | 0.00    | 0.0     | 0.0     | 0.0 | 0.0         | 7      | 0             | 0.0         | 0.0          | 0.0    | 7      | 30.4  | 16     | 0.0  | 0.0   | 69.6  | 0      | 0.0    | 16     | 69.6   |
| 4p  | 22      | 2.92    | 3.3     | 11.8    | 1.1 | 86.4        | 19     | 19            | 3.2         | 3.5          | 11.8   | 0      | 0.0   | 3      | 1.3  | 1.9   | 13.6  | 2      | 9.1    | 1      | 4.5    |
| 5p  | 36      | 2.53    | 3.9     | 15.5    | 1.5 | 58.3        | 24     | 21            | 4.3         | 4.2          | 15.5   | 3      | 8.3   | 12     | 0.0  | 0.1   | 33.3  | 9      | 25.0   | 3      | 8.3    |
| 5q  | 36      | 5.56    | 5.3     | 24.2    | 0.9 | 91.7        | 33     | 33            | 5.5         | 5.4          | 24.2   | 0      | 0.0   | 3      | 6.6  | 3.7   | 8.3   | 3      | 8.3    | 0      | 0.0    |
| 6p  | 14      | 1.87    | 1.9     | 6.0     | 1.0 | 57.1        | 8      | 8             | 2.8         | 1.8          | 6.0    | 0      | 0.0   | 6      | 0.6  | 1.1   | 42.9  | 6      | 42.9   | 0      | 0.0    |
| 6q  | 23      | 7.50    | 7.6     | 28.2    | 1.0 | 91.3        | 21     | 21            | 7.8         | 7.9          | 28.2   | 0      | 0.0   | 2      | 4.8  | 1.5   | 8.7   | 2      | 8.7    | 0      | 0.0    |
| 7p  | 22      | 1.14    | 3.3     | 15.8    | 2.9 | 22.7        | 5      | 5             | 3.4         | 6.9          | 15.8   | 0      | 0.0   | 17     | 0.5  | 0.4   | 77.3  | 17     | 77.3   | 0      | 0.0    |
| 7q  | 13      | 5.36    | 4.4     | 11.8    | 0.8 | 84.6        | 11     | 11            | 4.9         | 4.4          | 11.7   | 0      | 0.0   | 2      | 8.0  | 5.4   | 15.4  | 2      | 15.4   | 0      | 0.0    |
| 8p  | 11      | 2.07    | 3.0     | 8.4     | 1.5 | 72.7        | 8      | 8             | 2.7         | 3.3          | 8.4    | 0      | 0.0   | 3      | 0.3  | 0.2   | 27.3  | 3      | 27.3   | 0      | 0.0    |
| 8q  | 49      | 0.99    | 2.3     | 12.9    | 2.3 | 34.7        | 23     | 17            | 2.4         | 3.5          | 12.9   | 6      | 12.2  | 26     | 0.3  | 0.3   | 53.1  | 19     | 38.8   | 7      | 14.3   |
| 9p  | 17      | 2.77    | 5.1     | 17.8    | 1.8 | 41.2        | 9      | 7             | 3.3         | 4.9          | 12.2   | 2      | 11.8  | 8      | 3.0  | 6.1   | 47.1  | 5      | 29.4   | 3      | 17.6   |
| 9q  | 31      | 4.46    | 4.9     | 17.7    | 1.1 | 74.2        | 23     | 23            | 5.2         | 5.3          | 17.7   | 0      | 0.0   | 8      | 2.5  | 2.6   | 25.8  | 6      | 19.4   | 2      | 6.5    |
| 10q | 4       | 1.93    | 3.8     | 7.7     | 2.0 | 50.0        | 2      | 2             | 3.9         | 5.4          | 7.7    | 0      | 0.0   | 2      | 0.0  | 0.0   | 50.0  | 0      | 0.0    | 2      | 50.0   |
| 11p | 25      | 2.19    | 4.1     | 18.1    | 1.9 | 48.0        | 12     | 12            | 4.4         | 5.1          | 18.1   | 0      | 0.0   | 13     | 0.2  | 0.3   | 52.0  | 3      | 12.0   | 10     | 40.0   |
| 11q | 13      | 2.63    | 3.5     | 9.5     | 1.4 | 53.8        | 8      | 7             | 4.8         | 3.7          | 9.5    | 1      | 7.7   | 5      | 0.1  | 0.2   | 38.5  | 4      | 30.8   | 1      | 7.7    |
| 12p | 34      | 3.27    | 5.4     | 27.6    | 1.6 | 58.8        | 22     | 20            | 4.2         | 3.3          | 11.1   | 2      | 5.9   | 12     | 2.3  | 8.0   | 35.3  | 1      | 2.9    | 11     | 32.4   |
| 12q | 32      | 2.93    | 4.2     | 16.6    | 1.4 | 56.3        | 22     | 18            | 4.4         | 4.7          | 16.6   | 4      | 12.5  | 10     | 0.5  | 0.9   | 31.3  | 7      | 21.9   | 3      | 9.4    |
| 13q | 32      | 5.65    | 5.4     | 20.9    | 1.0 | 93.8        | 30     | 30            | 5.5         | 5.4          | 20.9   | 0      | 0.0   | 2      | 8.6  | 5.8   | 6.3   | 2      | 6.3    | 0      | 0.0    |
| 14q | 20      | 1.70    | 4.4     | 18.7    | 2.6 | 30.0        | 16     | 6             | 5.7         | 6.8          | 18.7   | 10     | 50.0  | 4      | 0.0  | 0.0   | 20.0  | 0      | 0.0    | 4      | 20.0   |
| 15q | 30      | 3.70    | 5.3     | 18.5    | 1.4 | 56.7        | 23     | 17            | 6.5         | 5.7          | 18.5   | 6      | 20.0  | 7      | 0.2  | 0.4   | 23.3  | 3      | 10.0   | 4      | 13.3   |
| 16q | 39      | 5.17    | 5.1     | 17.1    | 1.0 | 71.8        | 32     | 28            | 6.1         | 5.3          | 17.1   | 4      | 10.3  | 7      | 4.5  | 4.2   | 17.9  | 7      | 17.9   | 0      | 0.0    |
| 17q | 35      | 5.01    | 5.2     | 18.2    | 1.0 | 85.7        | 30     | 30            | 5.4         | 5.3          | 18.2   | 0      | 0.0   | 5      | 2.4  | 4.4   | 14.3  | 2      | 5.7    | 3      | 8.6    |
| 18p | 13      | 3.16    | 4.8     | 16.6    | 1.5 | 69.2        | 10     | 9             | 4.6         | 5.2          | 16.6   | 1      | 7.7   | 3      | 0.0  | 0.0   | 23.1  | 0      | 0.0    | 3      | 23.1   |
| 18q | 40      | 0.71    | 0.8     | 2.9     | 1.1 | 12.5        | 9      | 5             | 0.9         | 1.2          | 2.9    | 4      | 10.0  | 31     | 0.9  | 0.7   | 77.5  | 26     | 65.0   | 5      | 12.5   |
| 19p | 32      | 6.80    | 7.9     | 35.9    | 1.2 | 93.8        | 31     | 30            | 7.2         | 8.1          | 35.9   | 1      | 3.1   | 1      | 3.2  | 0.0   | 3.1   | 1      | 3.1    | 0      | 0.0    |
| 19q | 26      | 1.43    | 1.1     | 5.0     | 0.8 | 0.0         | 1      | 0             | 0.0         | 0.0          | 0.0    | 1      | 3.8   | 25     | 1.5  | 1.1   | 96.2  | 25     | 96.2   | 0      | 0.0    |
| 20p | 23      | 7.04    | 11.5    | 47.5    | 1.6 | 87.0        | 20     | 20            | 7.8         | 12.2         | 47.5   | 0      | 0.0   | 3      | 2.3  | 2.1   | 13.0  | 2      | 8.7    | 1      | 4.3    |
| 20q | 24      | 3.16    | 3.8     | 14.2    | 1.2 | 87.5        | 21     | 21            | 3.4         | 3.9          | 14.2   | 0      | 0.0   | 3      | 1.3  | 1.1   | 12.5  | 3      | 12.5   | 0      | 0.0    |
| 21q | 43      | 2.04    | 3.9     | 16.2    | 1.9 | 27.9        | 13     | 12            | 5.3         | 4.7          | 16.2   | 1      | 2.3   | 30     | 0.9  | 2.8   | 69.8  | 13     | 30.2   | 17     | 39.5   |

A

B

C

D

E

F

G

H

I

J

K

L

M

N

O

P

Q

R

S

T

U

V

SK-MEL-2

|         | Overall | Overall | Overall | Overall |     | EndTel % | EndTel | EndTel (-TFE) | EndTel Mean (- | EndTel STDev | EndTel | TFE    |       | ITS    |          | ITS   |       | ITS+   |        | ITS-   |        |
|---------|---------|---------|---------|---------|-----|----------|--------|---------------|----------------|--------------|--------|--------|-------|--------|----------|-------|-------|--------|--------|--------|--------|
| Chr arm | counts  | Mean    | STD     | Max     | CV  | (-TFE)   | Counts | counts        | TFE)           | (-TFE)       | Max    | counts | TFE % | Counts | ITS Mean | STDev | ITS % | counts | ITS+ % | counts | ITS- % |
| 1p      | 22      | 4.5     | 3.4     | 12.2    | 0.8 | 100.0    | 22     | 22            | 4.49           | 3.4          | 12.2   | 0      | 0.0   | 0      | 0.0      | 0.0   | 0.0   | 0      | 0.0    | 0      | 0.0    |
| 1q      | 30      | 4.2     | 3.4     | 12.0    | 0.8 | 80.0     | 25     | 24            | 4.47           | 3.6          | 12.0   | 1      | 3.3   | 5      | 3.9      | 2.0   | 16.7  | 5      | 16.7   | 0      | 0.0    |
| 2p      | 34      | 3.1     | 4.0     | 18.9    | 1.3 | 94.1     | 34     | 32            | 3.26           | 4.1          | 18.9   | 2      | 5.9   | 0      | 0.0      | 0.0   | 0.0   | 0      | 0.0    | 0      | 0.0    |
| 2q      | 35      | 2.7     | 2.4     | 8.6     | 0.9 | 88.6     | 32     | 31            | 2.67           | 2.4          | 8.6    | 1      | 2.9   | 3      | 3.6      | 1.1   | 8.6   | 3      | 8.6    | 0      | 0.0    |
| 3p      | 25      | 4.2     | 3.6     | 14.7    | 0.9 | 100.0    | 25     | 25            | 4.23           | 3.6          | 14.7   | 0      | 0.0   | 0      | 0.0      | 0.0   | 0.0   | 0      | 0.0    | 0      | 0.0    |
| 3q      | 8       | 2.6     | 6.5     | 18.7    | 2.5 | 0.0      | 0      | 0             | 0.00           | 0.0          | 0.0    | 0      | 0.0   | 8      | 2.6      | 6.5   | 100.0 | 4      | 50.0   | 4      | 50.0   |
| 4p      | 36      | 2.1     | 3.0     | 9.8     | 1.4 | 100.0    | 36     | 36            | 2.05           | 3.0          | 9.8    | 0      | 0.0   | 0      | 0.0      | 0.0   | 0.0   | 0      | 0.0    | 0      | 0.0    |
| 5q      | 38      | 4.0     | 3.3     | 14.4    | 0.8 | 97.4     | 37     | 37            | 4.07           | 3.3          | 14.4   | 0      | 0.0   | 1      | 2.4      | 0.0   | 2.6   | 1      | 2.6    | 0      | 0.0    |
| 6q      | 25      | 3.1     | 3.6     | 13.9    | 1.2 | 76.0     | 25     | 19            | 4.05           | 3.7          | 13.9   | 6      | 24.0  | 0      | 0.0      | 0.0   | 0.0   | 0      | 0.0    | 0      | 0.0    |
| 7p      | 14      | 1.7     | 1.9     | 5.7     | 1.2 | 85.7     | 14     | 12            | 1.95           | 2.0          | 5.7    | 2      | 14.3  | 0      | 0.0      | 0.0   | 0.0   | 0      | 0.0    | 0      | 0.0    |
| 7q      | 43      | 4.1     | 7.4     | 47.3    | 1.8 | 81.4     | 37     | 35            | 4.26           | 8.1          | 47.3   | 2      | 4.7   | 6      | 4.7      | 2.3   | 14.0  | 6      | 14.0   | 0      | 0.0    |
| 8p      | 42      | 2.8     | 3.0     | 11.7    | 1.1 | 85.7     | 41     | 36            | 2.95           | 2.9          | 11.7   | 5      | 11.9  | 1      | 10.3     | 0.0   | 2.4   | 1      | 2.4    | 0      | 0.0    |
| 8q      | 37      | 4.1     | 4.0     | 14.2    | 1.0 | 97.3     | 37     | 36            | 4.21           | 4.0          | 14.2   | 1      | 2.7   | 0      | 0.0      | 0.0   | 0.0   | 0      | 0.0    | 0      | 0.0    |
| 9p      | 37      | 2.9     | 3.1     | 14.1    | 1.1 | 83.8     | 32     | 31            | 3.06           | 3.2          | 14.1   | 1      | 2.7   | 5      | 2.6      | 2.5   | 13.5  | 5      | 13.5   | 0      | 0.0    |
| 9q      | 20      | 1.1     | 1.6     | 4.4     | 1.5 | 80.0     | 20     | 16            | 1.32           | 1.7          | 4.4    | 4      | 20.0  | 0      | 0.0      | 0.0   | 0.0   | 0      | 0.0    | 0      | 0.0    |
| 10p     | 26      | 3.2     | 3.2     | 11.2    | 1.0 | 88.5     | 25     | 23            | 3.46           | 3.2          | 11.2   | 2      | 7.7   | 1      | 2.9      | 0.0   | 3.8   | 1      | 3.8    | 0      | 0.0    |
| 10q     | 22      | 3.9     | 4.4     | 13.7    | 1.1 | 86.4     | 20     | 19            | 3.74           | 4.2          | 13.7   | 1      | 4.5   | 2      | 7.8      | 6.8   | 9.1   | 2      | 9.1    | 0      | 0.0    |
| 11q     | 10      | 3.0     | 4.7     | 13.2    | 1.6 | 60.0     | 10     | 6             | 4.99           | 5.2          | 13.2   | 4      | 40.0  | 0      | 0.0      | 0.0   | 0.0   | 0      | 0.0    | 0      | 0.0    |
| 12p     | 22      | 2.7     | 2.0     | 7.2     | 0.8 | 81.8     | 20     | 18            | 2.84           | 1.6          | 6.4    | 2      | 9.1   | 2      | 4.0      | 4.5   | 9.1   | 2      | 9.1    | 0      | 0.0    |
| 12q     | 31      | 4.8     | 4.3     | 13.7    | 0.9 | 93.5     | 31     | 29            | 5.17           | 4.3          | 13.7   | 2      | 6.5   | 0      | 0.0      | 0.0   | 0.0   | 0      | 0.0    | 0      | 0.0    |
| 13q     | 30      | 2.4     | 3.0     | 9.3     | 1.3 | 90.0     | 30     | 27            | 2.64           | 3.1          | 9.3    | 3      | 10.0  | 0      | 0.0      | 0.0   | 0.0   | 0      | 0.0    | 0      | 0.0    |
| 14q     | 25      | 1.5     | 2.9     | 14.3    | 2.0 | 84.0     | 25     | 21            | 1.73           | 3.1          | 14.3   | 4      | 16.0  | 0      | 0.0      | 0.0   | 0.0   | 0      | 0.0    | 0      | 0.0    |
| 15q     | 30      | 4.8     | 3.5     | 14.3    | 0.7 | 96.7     | 30     | 29            | 4.94           | 3.5          | 14.3   | 1      | 3.3   | 0      | 0.0      | 0.0   | 0.0   | 0      | 0.0    | 0      | 0.0    |
| 16q     | 24      | 1.7     | 2.2     | 10.9    | 1.3 | 75.0     | 20     | 18            | 1.35           | 1.1          | 3.5    | 2      | 8.3   | 4      | 4.4      | 4.6   | 16.7  | 4      | 16.7   | 0      | 0.0    |
| 17q     | 29      | 3.1     | 4.2     | 21.0    | 1.4 | 89.7     | 28     | 26            | 3.22           | 4.4          | 21.0   | 2      | 6.9   | 1      | 4.9      | 0.0   | 3.4   | 1      | 3.4    | 0      | 0.0    |
| 18p     | 4       | 0.6     | 0.4     | 0.8     | 0.8 | 50.0     | 2      | 2             | 0.6            | 0.4          | 1.1    | 0      | 0.0   | 2      | 0.8      | 0.2   | 50.0  | 1      | 25.0   | 1      | 25.0   |
| 18q     | 36      | 4.1     | 3.3     | 12.2    | 0.8 | 80.6     | 30     | 29            | 4.04           | 3.3          | 12.2   | 1      | 2.8   | 6      | 4.9      | 2.9   | 16.7  | 6      | 16.7   | 0      | 0.0    |
| 19p     | 36      | 2.9     | 3.2     | 13.2    | 1.1 | 83.3     | 31     | 30            | 2.66           | 3.0          | 13.2   | 1      | 2.8   | 5      | 5.1      | 3.9   | 13.9  | 5      | 13.9   | 0      | 0.0    |
| 19q     | 32      | 5.0     | 5.3     | 20.6    | 1.1 | 93.8     | 30     | 30            | 5.11           | 5.4          | 20.6   | 0      | 0.0   | 2      | 2.6      | 2.3   | 6.3   | 2      | 6.3    | 0      | 0.0    |
| 20p     | 20      | 4.5     | 4.7     | 16.4    | 1.0 | 75.0     | 16     | 15            | 4.84           | 5.2          | 16.4   | 1      | 5.0   | 4      | 4.6      | 2.5   | 20.0  | 4      | 20.0   | 0      | 0.0    |
| 20q     | 45      | 1.5     | 2.6     | 16.5    | 1.8 | 53.3     | 27     | 24            | 1.82           | 3.3          | 16.5   | 3      | 6.7   | 18     | 1.2      | 1.3   | 40.0  | 17     | 37.8   | 1      | 2.2    |
| 21q     | 34      | 4.3     | 3.7     | 15.3    | 0.9 | 88.2     | 30     | 30            | 4.14           | 3.8          | 15.3   | 0      | 0.0   | 4      | 5.1      | 2.4   | 11.8  | 4      | 11.8   | 0      | 0.0    |
| XqYq    | 21      | 1.4     | 1.8     | 7.5     | 1.3 | 66.7     | 17     | 14            | 1.38           | 1.9          | 7.5    | 3      | 14.3  | 4      | 2.6      | 1.3   | 19.0  | 4      | 19.0   | 0      | 0.0    |

A

B

C

D

E

F

G

H

I

J

K

L

M

N

O

P

Q

R

S

T

U

V

Saos-2

|         | Overall | Overall | Overall | Overall |     | EndTel % | EndTel | EndTel Counts | EndTel Mean | EndTel STDev (- | EndTel | TFE    |       | ITS    |          | ITS   |       | ITS +  |        | ITS-   |        |
|---------|---------|---------|---------|---------|-----|----------|--------|---------------|-------------|-----------------|--------|--------|-------|--------|----------|-------|-------|--------|--------|--------|--------|
| Chr arm | counts  | Mean    | STD     | Max     | CV  | (-TFE)   | Counts | (-TFE)        | (-TFE)      | TFE)            | Max    | counts | TFE % | Counts | ITS Mean | STDev | ITS % | counts | ITS+ % | counts | ITS- % |
| 1p      | 35      | 2.2     | 5.3     | 30.1    | 2.3 | 28.6     | 13     | 10            | 5.8         | 9.1             | 30.1   | 3      | 8.6   | 22     | 0.9      | 0.9   | 62.9  | 19.0   | 54.3   | 3      | 8.571  |
| 1q      | 7       | 1.7     | 2.1     | 5.3     | 1.3 | 0.0      | 3      | 0             | 0.0         | 0.0             | 0.0    | 3      | 42.9  | 4      | 2.9      | 2.0   | 57.1  | 4.0    | 57.1   | 0      | 0      |
| 2p      | 30      | 4.9     | 4.1     | 12.9    | 0.8 | 96.7     | 30     | 29            | 5.1         | 4.1             | 12.9   | 1      | 3.3   | 0      | 0.0      | 0.0   | 0.0   | 0.0    | 0.0    | 0      | 0      |
| 3p      | 31      | 7.5     | 5.6     | 22.9    | 0.8 | 96.8     | 31     | 30            | 7.8         | 5.6             | 22.9   | 1      | 3.2   | 0      | 0.0      | 0.0   | 0.0   | 0.0    | 0.0    | 0      | 0      |
| 3q      | 8       | 0.8     | 0.7     | 1.9     | 0.8 | 0.0      | 1      | 0             | 0.0         | 0.0             | 0.0    | 1      | 12.5  | 7      | 0.9      | 0.7   | 87.5  | 7.0    | 87.5   | 0      | 0      |
| 4p      | 23      | 3.4     | 3.4     | 12.5    | 1.0 | 91.3     | 23     | 21            | 3.7         | 3.3             | 12.5   | 2      | 8.7   | 0      | 0.0      | 0.0   | 0.0   | 0.0    | 0.0    | 0      | 0      |
| 4q      | 4       | 0.6     | 0.8     | 1.8     | 1.4 | 75.0     | 4      | 3             | 0.8         | 0.9             | 1.8    | 1      | 25.0  | 0      | 0.0      | 0.0   | 0.0   | 0.0    | 0.0    | 0      | 0      |
| 5p      | 21      | 4.6     | 4.8     | 19.2    | 1.0 | 61.9     | 13     | 13            | 5.8         | 5.6             | 19.2   | 0      | 0.0   | 8      | 2.7      | 1.9   | 38.1  | 8.0    | 38.1   | 0      | 0      |
| 5q      | 27      | 6.3     | 4.4     | 15.5    | 0.7 | 96.3     | 26     | 26            | 6.5         | 4.4             | 15.5   | 0      | 0.0   | 1      | 1.6      | 0.0   | 3.7   | 1.0    | 3.7    | 0      | 0      |
| 6p      | 15      | 7.3     | 9.5     | 27.5    | 1.3 | 86.7     | 14     | 13            | 8.2         | 10.0            | 27.5   | 1      | 6.7   | 1      | 3.1      | 0.0   | 6.7   | 1.0    | 6.7    | 0      | 0      |
| 6q      | 7       | 10.4    | 7.7     | 19.8    | 0.7 | 0.0      | 2      | 0             | 0.0         | 0.0             | 0.0    | 2      | 28.6  | 5      | 14.5     | 3.7   | 71.4  | 5.0    | 71.4   | 0      | 0      |
| 7q      | 27      | 2.0     | 1.5     | 5.5     | 0.7 | 96.3     | 26     | 26            | 2.1         | 1.5             | 5.5    | 0      | 0.0   | 1      | 1.3      | 0.0   | 3.7   | 1.0    | 3.7    | 0      | 0      |
| 8q      | 32      | 1.4     | 1.0     | 4.3     | 0.7 | 40.6     | 14     | 13            | 1.3         | 0.8             | 3.0    | 1      | 3.1   | 18     | 1.6      | 1.1   | 56.3  | 18.0   | 56.3   | 0      | 0      |
| 9p      | 25      | 4.9     | 5.3     | 17.8    | 1.1 | 96.0     | 25     | 24            | 5.1         | 5.4             | 17.8   | 1      | 4.0   | 0      | 0.0      | 0.0   | 0.0   | 0.0    | 0.0    | 0      | 0      |
| 10p     | 19      | 2.1     | 1.9     | 6.8     | 0.9 | 89.5     | 19     | 17            | 2.3         | 1.9             | 6.8    | 2      | 10.5  | 0      | 0.0      | 0.0   | 0.0   | 0.0    | 0.0    | 0      | 0      |
| 10q     | 32      | 2.9     | 3.8     | 16.1    | 1.3 | 93.8     | 30     | 30            | 3.0         | 3.9             | 16.1   | 0      | 0.0   | 2      | 0.7      | 0.8   | 6.3   | 2.0    | 6.3    | 0      | 0      |
| 11p     | 11      | 5.5     | 5.2     | 13.6    | 1.0 | 54.5     | 6      | 6             | 6.2         | 5.6             | 13.6   | 0      | 0.0   | 5      | 4.7      | 5.2   | 45.5  | 5.0    | 45.5   | 0      | 0      |
| 12p     | 27      | 6.3     | 4.8     | 15.0    | 0.8 | 92.6     | 27     | 25            | 6.8         | 4.6             | 15.0   | 2      | 7.4   | 0      | 0.0      | 0.0   | 0.0   | 0.0    | 0.0    | 0      | 0      |
| 13q     | 35      | 6.5     | 6.1     | 23.3    | 0.9 | 82.9     | 30     | 29            | 6.6         | 6.2             | 23.3   | 1      | 2.9   | 5      | 7.6      | 6.2   | 14.3  | 5.0    | 14.3   | 0      | 0      |
| 14q     | 24      | 2.2     | 2.9     | 7.9     | 1.3 | 95.8     | 24     | 23            | 2.3         | 2.9             | 7.9    | 1      | 4.2   | 0      | 0.0      | 0.0   | 0.0   | 0.0    | 0.0    | 0      | 0      |
| 16q     | 12      | 6.8     | 17.7    | 62.8    | 2.6 | 83.3     | 12     | 10            | 8.2         | 19.2            | 62.8   | 2      | 16.7  | 0      | 0.0      | 0.0   | 0.0   | 0.0    | 0.0    | 0      | 0      |
| 17q     | 23      | 1.7     | 2.3     | 10.2    | 1.3 | 21.7     | 7      | 5             | 2.6         | 1.7             | 4.8    | 2      | 8.7   | 16     | 1.7      | 2.5   | 69.6  | 16.0   | 69.6   | 0      | 0      |
| 18p     | 30      | 3.8     | 3.7     | 16.2    | 1.0 | 100.0    | 30     | 30            | 3.8         | 3.7             | 16.2   | 0      | 0.0   | 0      | 0.0      | 0.0   | 0.0   | 0.0    | 0.0    | 0      | 0      |
| 18q     | 28      | 2.4     | 3.4     | 14.2    | 1.4 | 85.7     | 28     | 24            | 2.8         | 3.5             | 14.2   | 4      | 14.3  | 0      | 0.0      | 0.0   | 0.0   | 0.0    | 0.0    | 0      | 0      |
| 19p     | 6       | 4.3     | 4.0     | 11.7    | 0.9 | 0.0      | 1      | 0             | 0.0         | 0.0             | 0.0    | 1      | 16.7  | 5      | 5.1      | 3.9   | 83.3  | 5.0    | 83.3   | 0      | 0      |
| 19q     | 14      | 0.4     | 1.1     | 4.2     | 3.1 | 0.0      | 12     | 0             | 0.0         | 0.0             | 0.0    | 12     | 85.7  | 2      | 2.6      | 2.3   | 14.3  | 2.0    | 14.3   | 0      | 0      |
| 20p     | 21      | 1.9     | 1.5     | 4.9     | 0.8 | 95.2     | 21     | 20            | 2.0         | 1.5             | 4.9    | 1      | 4.8   | 0      | 0.0      | 0.0   | 0.0   | 0.0    | 0.0    | 0      | 0      |
| 21q     | 29      | 1.7     | 0.8     | 3.6     | 0.5 | 20.7     | 7      | 6             | 1.3         | 0.6             | 2.1    | 1      | 3.4   | 22     | 1.9      | 0.7   | 75.9  | 22.0   | 75.9   | 0      | 0      |

UMUC3

| A       | B              | C            | D           | E           | F   | G               | H             | I                    | J           | K            | L          | M          | N     | O          | P        | Q         | R     | S           | T      | U           | V      |
|---------|----------------|--------------|-------------|-------------|-----|-----------------|---------------|----------------------|-------------|--------------|------------|------------|-------|------------|----------|-----------|-------|-------------|--------|-------------|--------|
| Chr arm | Overall counts | Overall Mean | Overall STD | Overall Max | CV  | EndTel % (-TFE) | EndTel counts | EndTel (-TFE) counts | EndTel Mean | EndTel STDev | EndTel Max | TFE counts | TFE % | ITS counts | ITS Mean | ITS STDev | ITS % | ITS+ counts | ITS+ % | ITS- counts | ITS- % |
| 1p      | 30             | 3.7          | 3.1         | 10.8        | 0.8 | 100.0           | 30            | 30.0                 | 3.7         | 3.1          | 10.8       | 0          | 0.0   | 0.0        | 0.0      | 0.0       | 0.0   | 0           | 0.0    | 0           | 0.0    |
| 1q      | 25             | 3.0          | 2.9         | 11.3        | 1.0 | 100.0           | 25            | 25.0                 | 3.0         | 2.9          | 11.3       | 0          | 0.0   | 0.0        | 0.0      | 0.0       | 0.0   | 0           | 0.0    | 0           | 0.0    |
| 2p      | 30             | 2.4          | 2.0         | 6.7         | 0.8 | 100.0           | 30            | 30.0                 | 2.4         | 2.0          | 6.7        | 0          | 0.0   | 0.0        | 0.0      | 0.0       | 0.0   | 0           | 0.0    | 0           | 0.0    |
| 2q      | 30             | 2.4          | 2.0         | 7.8         | 0.8 | 100.0           | 30            | 30.0                 | 2.4         | 2.0          | 7.8        | 0          | 0.0   | 0.0        | 0.0      | 0.0       | 0.0   | 0           | 0.0    | 0           | 0.0    |
| 3p      | 30             | 5.4          | 3.5         | 14.6        | 0.7 | 100.0           | 30            | 30.0                 | 5.4         | 3.5          | 14.6       | 0          | 0.0   | 0.0        | 0.0      | 0.0       | 0.0   | 0           | 0.0    | 0           | 0.0    |
| 3q      | 30             | 4.6          | 3.3         | 12.0        | 0.7 | 100.0           | 30            | 30.0                 | 4.6         | 3.3          | 12.0       | 0          | 0.0   | 0.0        | 0.0      | 0.0       | 0.0   | 0           | 0.0    | 0           | 0.0    |
| 4p      | 30             | 3.7          | 2.9         | 9.7         | 0.8 | 100.0           | 30            | 30.0                 | 3.7         | 2.9          | 9.7        | 0          | 0.0   | 0.0        | 0.0      | 0.0       | 0.0   | 0           | 0.0    | 0           | 0.0    |
| 4q      | 9              | 4.0          | 3.3         | 9.6         | 0.8 | 100.0           | 9             | 9.0                  | 4.0         | 3.3          | 9.6        | 0          | 0.0   | 0.0        | 0.0      | 0.0       | 0.0   | 0           | 0.0    | 0           | 0.0    |
| 5p      | 20             | 1.8          | 1.4         | 5.6         | 0.8 | 100.0           | 20            | 20.0                 | 1.8         | 1.4          | 5.6        | 0          | 0.0   | 0.0        | 0.0      | 0.0       | 0.0   | 0           | 0.0    | 0           | 0.0    |
| 5q      | 30             | 2.9          | 1.9         | 7.3         | 0.7 | 100.0           | 30            | 30.0                 | 2.9         | 1.9          | 7.3        | 0          | 0.0   | 0.0        | 0.0      | 0.0       | 0.0   | 0           | 0.0    | 0           | 0.0    |
| 6q      | 23             | 4.5          | 3.3         | 9.7         | 0.7 | 100.0           | 23            | 23.0                 | 4.5         | 3.3          | 9.7        | 0          | 0.0   | 0.0        | 0.0      | 0.0       | 0.0   | 0           | 0.0    | 0           | 0.0    |
| 7q      | 30             | 2.7          | 2.0         | 8.1         | 0.7 | 100.0           | 30            | 30.0                 | 2.7         | 2.0          | 8.1        | 0          | 0.0   | 0.0        | 0.0      | 0.0       | 0.0   | 0           | 0.0    | 0           | 0.0    |
| 8q      | 30             | 1.0          | 1.3         | 6.7         | 1.4 | 100.0           | 30            | 30.0                 | 1.0         | 1.3          | 6.7        | 0          | 0.0   | 0.0        | 0.0      | 0.0       | 0.0   | 0           | 0.0    | 0           | 0.0    |
| 9p      | 30             | 1.7          | 1.7         | 5.8         | 1.0 | 100.0           | 30            | 30.0                 | 1.7         | 1.7          | 5.8        | 0          | 0.0   | 0.0        | 0.0      | 0.0       | 0.0   | 0           | 0.0    | 0           | 0.0    |
| 9q      | 30             | 1.9          | 1.0         | 4.5         | 0.5 | 100.0           | 30            | 30.0                 | 1.9         | 1.0          | 4.5        | 0          | 0.0   | 0.0        | 0.0      | 0.0       | 0.0   | 0           | 0.0    | 0           | 0.0    |
| 11q     | 20             | 3.5          | 3.5         | 12.7        | 1.0 | 100.0           | 20            | 20.0                 | 3.5         | 3.5          | 12.7       | 0          | 0.0   | 0.0        | 0.0      | 0.0       | 0.0   | 0           | 0.0    | 0           | 0.0    |
| 12p     | 30             | 3.7          | 3.2         | 14.1        | 0.9 | 100.0           | 30            | 30.0                 | 3.7         | 3.2          | 14.1       | 0          | 0.0   | 0.0        | 0.0      | 0.0       | 0.0   | 0           | 0.0    | 0           | 0.0    |
| 12q     | 30             | 5.8          | 3.8         | 14.2        | 0.6 | 100.0           | 30            | 30.0                 | 5.8         | 3.8          | 14.2       | 0          | 0.0   | 0.0        | 0.0      | 0.0       | 0.0   | 0           | 0.0    | 0           | 0.0    |
| 13q     | 30             | 2.5          | 2.4         | 10.0        | 0.9 | 100.0           | 30            | 30.0                 | 2.5         | 2.4          | 10.0       | 0          | 0.0   | 0.0        | 0.0      | 0.0       | 0.0   | 0           | 0.0    | 0           | 0.0    |
| 14q     | 9              | 1.9          | 1.5         | 4.3         | 0.8 | 100.0           | 9             | 9.0                  | 1.9         | 1.5          | 4.3        | 0          | 0.0   | 0.0        | 0.0      | 0.0       | 0.0   | 0           | 0.0    | 0           | 0.0    |
| 15q     | 18             | 2.9          | 2.2         | 8.1         | 0.7 | 100.0           | 18            | 18.0                 | 2.9         | 2.2          | 8.1        | 0          | 0.0   | 0.0        | 0.0      | 0.0       | 0.0   | 0           | 0.0    | 0           | 0.0    |
| 18p     | 19             | 3.5          | 3.1         | 11.3        | 0.9 | 100.0           | 19            | 19.0                 | 3.5         | 3.1          | 11.3       | 0          | 0.0   | 0.0        | 0.0      | 0.0       | 0.0   | 0           | 0.0    | 0           | 0.0    |
| 18q     | 30             | 3.0          | 1.9         | 8.8         | 0.6 | 100.0           | 30            | 30.0                 | 3.0         | 1.9          | 8.8        | 0          | 0.0   | 0.0        | 0.0      | 0.0       | 0.0   | 0           | 0.0    | 0           | 0.0    |
| 19p     | 30             | 2.1          | 0.8         | 4.0         | 0.4 | 100.0           | 30            | 30.0                 | 2.1         | 0.8          | 4.0        | 0          | 0.0   | 0.0        | 0.0      | 0.0       | 0.0   | 0           | 0.0    | 0           | 0.0    |
| 20p     | 30             | 1.6          | 1.1         | 5.0         | 0.7 | 100.0           | 30            | 30.0                 | 1.6         | 1.1          | 5.0        | 0          | 0.0   | 0.0        | 0.0      | 0.0       | 0.0   | 0           | 0.0    | 0           | 0.0    |
| 20q     | 30             | 2.1          | 2.1         | 7.0         | 1.0 | 100.0           | 30            | 30.0                 | 2.1         | 2.1          | 7.0        | 0          | 0.0   | 0.0        | 0.0      | 0.0       | 0.0   | 0           | 0.0    | 0           | 0.0    |
| 21q     | 30             | 3.2          | 2.6         | 10.5        | 0.8 | 100.0           | 30            | 30.0                 | 3.2         | 2.6          | 10.5       | 0          | 0.0   | 0.0        | 0.0      | 0.0       | 0.0   | 0           | 0.0    | 0           | 0.0    |
| XqYq    | 16             | 4.9          | 4.7         | 14.7        | 1.0 | 100.0           | 16            | 16.0                 | 4.9         | 4.7          | 14.7       | 0          | 0.0   | 0.0        | 0.0      | 0.0       | 0.0   | 0           | 0.0    | 0           | 0.0    |

LNCaP

| A       | B              | C            | D           | E           | F   | G               | H             | I                    | J           | K            | L          | M          | N     | O          | P        | Q         | R     | S           | T      | U           | V      |
|---------|----------------|--------------|-------------|-------------|-----|-----------------|---------------|----------------------|-------------|--------------|------------|------------|-------|------------|----------|-----------|-------|-------------|--------|-------------|--------|
| Chr arm | Overall counts | Overall Mean | Overall STD | Overall Max | CV  | EndTel % (-TFE) | EndTel counts | EndTel (-TFE) counts | EndTel Mean | EndTel STDev | EndTel Max | TFE counts | TFE % | ITS counts | ITS Mean | ITS STDev | ITS % | ITS+ counts | ITS+ % | ITS- counts | ITS- % |
|         |                |              |             |             |     |                 |               |                      |             |              |            |            |       |            |          |           |       |             |        |             |        |
| 1p      | 12             | 13.2         | 5.4         | 23.5        | 0.4 | 100.0           | 12            | 12                   | 13.2        | 5.4          | 23.5       | 0          | 0.0   | 0.0        | 0.0      | 0.0       | 0.0   | 0           | 0.0    | 0           | 0.0    |
| 1q      | 30             | 3.2          | 1.2         | 5.7         | 0.4 | 100.0           | 30            | 30                   | 3.2         | 1.2          | 5.7        | 0          | 0.0   | 0.0        | 0.0      | 0.0       | 0.0   | 0           | 0.0    | 0           | 0.0    |
| 2p      | 30             | 3.1          | 1.2         | 7.5         | 0.4 | 100.0           | 30            | 30                   | 3.1         | 1.2          | 7.5        | 0          | 0.0   | 0.0        | 0.0      | 0.0       | 0.0   | 0           | 0.0    | 0           | 0.0    |
| 2q      | 30             | 3.3          | 2.0         | 7.8         | 0.6 | 100.0           | 30            | 30                   | 3.3         | 2.0          | 7.8        | 0          | 0.0   | 0.0        | 0.0      | 0.0       | 0.0   | 0           | 0.0    | 0           | 0.0    |
| 3p      | 30             | 3.5          | 1.7         | 7.7         | 0.5 | 100.0           | 30            | 30                   | 3.5         | 1.7          | 7.7        | 0          | 0.0   | 0.0        | 0.0      | 0.0       | 0.0   | 0           | 0.0    | 0           | 0.0    |
| 3q      | 29             | 3.6          | 2.1         | 8.9         | 0.6 | 100.0           | 29            | 29                   | 3.6         | 2.1          | 8.9        | 0          | 0.0   | 0.0        | 0.0      | 0.0       | 0.0   | 0           | 0.0    | 0           | 0.0    |
| 4p      | 30             | 3.3          | 1.7         | 8.4         | 0.5 | 100.0           | 30            | 30                   | 3.3         | 1.7          | 8.4        | 0          | 0.0   | 0.0        | 0.0      | 0.0       | 0.0   | 0           | 0.0    | 0           | 0.0    |
| 5p      | 28             | 3.4          | 1.5         | 7.2         | 0.4 | 100.0           | 28            | 28                   | 3.4         | 1.5          | 7.2        | 0          | 0.0   | 0.0        | 0.0      | 0.0       | 0.0   | 0           | 0.0    | 0           | 0.0    |
| 5q      | 30             | 4.5          | 1.6         | 9.2         | 0.4 | 100.0           | 30            | 30                   | 4.5         | 1.6          | 9.2        | 0          | 0.0   | 0.0        | 0.0      | 0.0       | 0.0   | 0           | 0.0    | 0           | 0.0    |
| 6p      | 30             | 3.1          | 1.8         | 7.9         | 0.6 | 100.0           | 30            | 30                   | 3.1         | 1.8          | 7.9        | 0          | 0.0   | 0.0        | 0.0      | 0.0       | 0.0   | 0           | 0.0    | 0           | 0.0    |
| 6q      | 23             | 4.1          | 1.6         | 7.4         | 0.4 | 100.0           | 23            | 23                   | 4.1         | 1.6          | 7.4        | 0          | 0.0   | 0.0        | 0.0      | 0.0       | 0.0   | 0           | 0.0    | 0           | 0.0    |
| 7p      | 30             | 2.5          | 1.0         | 5.1         | 0.4 | 100.0           | 30            | 30                   | 2.5         | 1.0          | 5.1        | 0          | 0.0   | 0.0        | 0.0      | 0.0       | 0.0   | 0           | 0.0    | 0           | 0.0    |
| 7q      | 30             | 2.7          | 1.4         | 6.3         | 0.5 | 100.0           | 30            | 30                   | 2.7         | 1.4          | 6.3        | 0          | 0.0   | 0.0        | 0.0      | 0.0       | 0.0   | 0           | 0.0    | 0           | 0.0    |
| 8p      | 30             | 2.3          | 1.3         | 5.1         | 0.6 | 100.0           | 30            | 30                   | 2.3         | 1.3          | 5.1        | 0          | 0.0   | 0.0        | 0.0      | 0.0       | 0.0   | 0           | 0.0    | 0           | 0.0    |
| 8q      | 30             | 2.3          | 1.6         | 7.1         | 0.7 | 100.0           | 30            | 30                   | 2.3         | 1.6          | 7.1        | 0          | 0.0   | 0.0        | 0.0      | 0.0       | 0.0   | 0           | 0.0    | 0           | 0.0    |
| 9p      | 30             | 3.4          | 2.9         | 14.5        | 0.8 | 100.0           | 30            | 30                   | 3.4         | 2.9          | 14.5       | 0          | 0.0   | 0.0        | 0.0      | 0.0       | 0.0   | 0           | 0.0    | 0           | 0.0    |
| 9q      | 30             | 3.3          | 1.5         | 6.7         | 0.5 | 100.0           | 30            | 30                   | 3.3         | 1.5          | 6.7        | 0          | 0.0   | 0.0        | 0.0      | 0.0       | 0.0   | 0           | 0.0    | 0           | 0.0    |
| 10p     | 25             | 2.3          | 1.6         | 7.1         | 0.7 | 100.0           | 25            | 25                   | 2.3         | 1.6          | 7.1        | 0          | 0.0   | 0.0        | 0.0      | 0.0       | 0.0   | 0           | 0.0    | 0           | 0.0    |
| 10q     | 16             | 2.0          | 0.8         | 3.4         | 0.4 | 100.0           | 16            | 16                   | 2.0         | 0.8          | 3.4        | 0          | 0.0   | 0.0        | 0.0      | 0.0       | 0.0   | 0           | 0.0    | 0           | 0.0    |
| 11p     | 25             | 2.6          | 1.0         | 5.1         | 0.4 | 100.0           | 25            | 25                   | 2.6         | 1.0          | 5.1        | 0          | 0.0   | 0.0        | 0.0      | 0.0       | 0.0   | 0           | 0.0    | 0           | 0.0    |
| 11q     | 30             | 2.2          | 1.5         | 7.6         | 0.7 | 100.0           | 30            | 30                   | 2.2         | 1.5          | 7.6        | 0          | 0.0   | 0.0        | 0.0      | 0.0       | 0.0   | 0           | 0.0    | 0           | 0.0    |
| 12p     | 30             | 3.0          | 2.3         | 13.2        | 0.7 | 100.0           | 30            | 30                   | 3.0         | 2.3          | 13.2       | 0          | 0.0   | 0.0        | 0.0      | 0.0       | 0.0   | 0           | 0.0    | 0           | 0.0    |
| 12q     | 30             | 3.2          | 1.9         | 8.1         | 0.6 | 100.0           | 30            | 30                   | 3.2         | 1.9          | 8.1        | 0          | 0.0   | 0.0        | 0.0      | 0.0       | 0.0   | 0           | 0.0    | 0           | 0.0    |
| 13q     | 25             | 3.0          | 1.9         | 6.8         | 0.6 | 100.0           | 25            | 25                   | 3.0         | 1.9          | 6.8        | 0          | 0.0   | 0.0        | 0.0      | 0.0       | 0.0   | 0           | 0.0    | 0           | 0.0    |
| 14q     | 13             | 3.9          | 2.0         | 7.5         | 0.5 | 100.0           | 13            | 13                   | 3.9         | 2.0          | 7.5        | 0          | 0.0   | 0.0        | 0.0      | 0.0       | 0.0   | 0           | 0.0    | 0           | 0.0    |
| 15q     | 30             | 2.8          | 1.1         | 5.4         | 0.4 | 100.0           | 30            | 30                   | 2.8         | 1.1          | 5.4        | 0          | 0.0   | 0.0        | 0.0      | 0.0       | 0.0   | 0           | 0.0    | 0           | 0.0    |
| 16p     | 31             | 4.0          | 2.4         | 10.3        | 0.6 | 100.0           | 31            | 31                   | 4.0         | 2.4          | 10.3       | 0          | 0.0   | 0.0        | 0.0      | 0.0       | 0.0   | 0           | 0.0    | 0           | 0.0    |
| 16q     | 30             | 3.0          | 0.9         | 5.1         | 0.3 | 100.0           | 30            | 30                   | 3.0         | 0.9          | 5.1        | 0          | 0.0   | 0.0        | 0.0      | 0.0       | 0.0   | 0           | 0.0    | 0           | 0.0    |
| 17q     | 30             | 2.6          | 1.0         | 5.1         | 0.4 | 100.0           | 30            | 30                   | 2.6         | 1.0          | 5.1        | 0          | 0.0   | 0.0        | 0.0      | 0.0       | 0.0   | 0           | 0.0    | 0           | 0.0    |
| 18q     | 28             | 4.1          | 1.7         | 9.3         | 0.4 | 100.0           | 28            | 28                   | 4.1         | 1.7          | 9.3        | 0          | 0.0   | 0.0        | 0.0      | 0.0       | 0.0   | 0           | 0.0    | 0           | 0.0    |
| 19p     | 30             | 2.7          | 1.5         | 7.7         | 0.6 | 100.0           | 30            | 30                   | 2.7         | 1.5          | 7.7        | 0          | 0.0   | 0.0        | 0.0      | 0.0       | 0.0   | 0           | 0.0    | 0           | 0.0    |
| 20p     | 15             | 1.9          | 1.0         | 3.5         | 0.5 | 100.0           | 15            | 15                   | 1.9         | 1.0          | 3.5        | 0          | 0.0   | 0.0        | 0.0      | 0.0       | 0.0   | 0           | 0.0    | 0           | 0.0    |
| 20q     | 30             | 2.7          | 1.4         | 6.2         | 0.5 | 100.0           | 30            | 30                   | 2.7         | 1.4          | 6.2        | 0          | 0.0   | 0.0        | 0.0      | 0.0       | 0.0   | 0           | 0.0    | 0           | 0.0    |
| 21q     | 29             | 3.9          | 1.7         | 7.3         | 0.4 | 100.0           | 29            | 29                   | 3.9         | 1.7          | 7.3        | 0          | 0.0   | 0.0        | 0.0      | 0.0       | 0.0   | 0           | 0.0    | 0           | 0.0    |

| A       | B              | C            | D           | E           | F   | G               | H             | I                    | J           | K            | L          | M          | N     | O          | P        | Q         | R     | S           | T      | U           | V      |
|---------|----------------|--------------|-------------|-------------|-----|-----------------|---------------|----------------------|-------------|--------------|------------|------------|-------|------------|----------|-----------|-------|-------------|--------|-------------|--------|
| IMR90-S |                |              |             |             |     |                 |               |                      |             |              |            |            |       |            |          |           |       |             |        |             |        |
| Chr arm | Overall counts | Overall Mean | Overall STD | Overall Max | CV  | EndTel % (-TFE) | EndTel counts | EndTel (-TFE) counts | EndTel Mean | EndTel STDev | EndTel Max | TFE counts | TFE % | ITS counts | ITS Mean | ITS STDev | ITS % | ITS+ counts | ITS+ % | ITS- counts | ITS- % |
| 1q      | 22             | 4.8          | 2.1         | 9.1         | 0.4 | 100.0           | 22            | 22                   | 4.8         | 2.1          | 9.1        | 0          | 0.00  | 0          | 0.0      | 0.0       | 0.0   | 0           | 0.0    | 0           | 0.0    |
| 2p      | 28             | 3.2          | 2.1         | 9.1         | 0.7 | 100.0           | 28            | 28                   | 3.2         | 2.1          | 9.1        | 0          | 0.00  | 0          | 0.0      | 0.0       | 0.0   | 0           | 0.0    | 0           | 0.0    |
| 2q      | 30             | 5.5          | 4.8         | 16.4        | 0.9 | 100.0           | 30            | 30                   | 5.5         | 4.8          | 16.4       | 0          | 0.00  | 0          | 0.0      | 0.0       | 0.0   | 0           | 0.0    | 0           | 0.0    |
| 3p      | 30             | 4.9          | 2.7         | 15.7        | 0.6 | 100.0           | 30            | 30                   | 4.9         | 2.7          | 15.7       | 0          | 0.00  | 0          | 0.0      | 0.0       | 0.0   | 0           | 0.0    | 0           | 0.0    |
| 4p      | 28             | 4.8          | 2.8         | 10.9        | 0.6 | 100.0           | 28            | 28                   | 4.8         | 2.8          | 10.9       | 0          | 0.00  | 0          | 0.0      | 0.0       | 0.0   | 0           | 0.0    | 0           | 0.0    |
| 5p      | 26             | 3.4          | 2.3         | 7.4         | 0.7 | 100.0           | 26            | 26                   | 3.4         | 2.3          | 7.4        | 0          | 0.00  | 0          | 0.0      | 0.0       | 0.0   | 0           | 0.0    | 0           | 0.0    |
| 5q      | 30             | 3.8          | 2.2         | 8.6         | 0.6 | 100.0           | 30            | 30                   | 3.8         | 2.2          | 8.6        | 0          | 0.00  | 0          | 0.0      | 0.0       | 0.0   | 0           | 0.0    | 0           | 0.0    |
| 6p      | 28             | 3.2          | 1.5         | 5.6         | 0.5 | 100.0           | 28            | 28                   | 3.2         | 1.5          | 5.6        | 0          | 0.00  | 0          | 0.0      | 0.0       | 0.0   | 0           | 0.0    | 0           | 0.0    |
| 6q      | 26             | 4.2          | 2.8         | 10.5        | 0.7 | 100.0           | 26            | 26                   | 4.2         | 2.8          | 10.5       | 0          | 0.00  | 0          | 0.0      | 0.0       | 0.0   | 0           | 0.0    | 0           | 0.0    |
| 7q      | 30             | 5.2          | 3.0         | 12.7        | 0.6 | 100.0           | 30            | 30                   | 5.2         | 3.0          | 12.7       | 0          | 0.00  | 0          | 0.0      | 0.0       | 0.0   | 0           | 0.0    | 0           | 0.0    |
| 8p      | 23             | 3.4          | 2.5         | 9.2         | 0.7 | 100.0           | 23            | 23                   | 3.4         | 2.5          | 9.2        | 0          | 0.00  | 0          | 0.0      | 0.0       | 0.0   | 0           | 0.0    | 0           | 0.0    |
| 8q      | 30             | 2.8          | 2.0         | 5.9         | 0.7 | 100.0           | 30            | 30                   | 2.8         | 2.0          | 5.9        | 0          | 0.00  | 0          | 0.0      | 0.0       | 0.0   | 0           | 0.0    | 0           | 0.0    |
| 9p      | 30             | 4.4          | 2.2         | 8.8         | 0.5 | 100.0           | 30            | 30                   | 4.4         | 2.2          | 8.8        | 0          | 0.00  | 0          | 0.0      | 0.0       | 0.0   | 0           | 0.0    | 0           | 0.0    |
| 10p     | 27             | 4.0          | 2.9         | 12.3        | 0.7 | 100.0           | 27            | 27                   | 4.0         | 2.9          | 12.3       | 0          | 0.00  | 0          | 0.0      | 0.0       | 0.0   | 0           | 0.0    | 0           | 0.0    |
| 11p     | 30             | 3.2          | 2.1         | 7.6         | 0.6 | 100.0           | 30            | 30                   | 3.2         | 2.1          | 7.6        | 0          | 0.00  | 0          | 0.0      | 0.0       | 0.0   | 0           | 0.0    | 0           | 0.0    |
| 11q     | 20             | 4.5          | 1.9         | 7.8         | 0.4 | 100.0           | 20            | 20                   | 4.5         | 1.9          | 7.8        | 0          | 0.00  | 0          | 0.0      | 0.0       | 0.0   | 0           | 0.0    | 0           | 0.0    |
| 12p     | 30             | 2.4          | 1.3         | 5.3         | 0.5 | 100.0           | 30            | 30                   | 2.4         | 1.3          | 5.3        | 0          | 0.00  | 0          | 0.0      | 0.0       | 0.0   | 0           | 0.0    | 0           | 0.0    |
| 12q     | 30             | 3.8          | 2.8         | 11.2        | 0.7 | 100.0           | 30            | 30                   | 3.8         | 2.8          | 11.2       | 0          | 0.00  | 0          | 0.0      | 0.0       | 0.0   | 0           | 0.0    | 0           | 0.0    |
| 13q     | 30             | 5.1          | 3.1         | 12.2        | 0.6 | 100.0           | 30            | 30                   | 5.1         | 3.1          | 12.2       | 0          | 0.00  | 0          | 0.0      | 0.0       | 0.0   | 0           | 0.0    | 0           | 0.0    |
| 14q     | 30             | 3.0          | 3.1         | 10.9        | 1.1 | 100.0           | 30            | 30                   | 3.0         | 3.1          | 10.9       | 0          | 0.00  | 0          | 0.0      | 0.0       | 0.0   | 0           | 0.0    | 0           | 0.0    |
| 15q     | 28             | 3.8          | 2.3         | 8.8         | 0.6 | 100.0           | 28            | 28                   | 3.8         | 2.3          | 8.8        | 0          | 0.00  | 0          | 0.0      | 0.0       | 0.0   | 0           | 0.0    | 0           | 0.0    |
| 17q     | 30             | 4.7          | 2.1         | 10.1        | 0.5 | 100.0           | 30            | 30                   | 4.7         | 2.1          | 10.1       | 0          | 0.00  | 0          | 0.0      | 0.0       | 0.0   | 0           | 0.0    | 0           | 0.0    |
| 18p     | 28             | 3.9          | 2.4         | 8.0         | 0.6 | 100.0           | 28            | 28                   | 3.9         | 2.4          | 8.0        | 0          | 0.00  | 0          | 0.0      | 0.0       | 0.0   | 0           | 0.0    | 0           | 0.0    |
| 18q     | 26             | 5.2          | 2.1         | 9.5         | 0.4 | 100.0           | 26            | 26                   | 5.2         | 2.1          | 9.5        | 0          | 0.00  | 0          | 0.0      | 0.0       | 0.0   | 0           | 0.0    | 0           | 0.0    |
| 19p     | 30             | 3.0          | 2.1         | 10.0        | 0.7 | 100.0           | 30            | 30                   | 3.0         | 2.1          | 10.0       | 0          | 0.00  | 0          | 0.0      | 0.0       | 0.0   | 0           | 0.0    | 0           | 0.0    |
| 20q     | 17             | 3.6          | 1.6         | 6.4         | 0.4 | 100.0           | 17            | 17                   | 3.6         | 1.6          | 6.4        | 0          | 0.00  | 0          | 0.0      | 0.0       | 0.0   | 0           | 0.0    | 0           | 0.0    |
| 21q     | 30             | 3.6          | 1.9         | 7.9         | 0.5 | 100.0           | 30            | 30                   | 3.6         | 1.9          | 7.9        | 0          | 0.00  | 0          | 0.0      | 0.0       | 0.0   | 0           | 0.0    | 0           | 0.0    |
