# Supplementary material for: Single-Molecule Telomere Assay via Optical Mapping (SMTA-OM) Can Potentially Define the ALT Positivity of Cancer
Source: MDPI journal article supplement (doi:10.3390/genes14061278), 2023-06-16
Supplement: s1 [file s1]

| A                                                   | B       | C       | D     |
|-----------------------------------------------------|---------|---------|-------|
| P values between ALT+, IMR90-S, and TEL+ cell lines |         |         |       |
|                                                     | IMR90-S | UM-UC-3 | LNCaP |
| <b>Overall telomere mean length</b>                 |         |         |       |
| U2OS                                                | 0.073   | 0.594   | 0.881 |
| SK-MEL-2                                            | 0.002   | 0.958   | 0.485 |
| Saos2                                               | 0.661   | 0.180   | 0.732 |
| <b>EndTel (-TFE) mean length</b>                    |         |         |       |
| U2OS                                                | 0.072   | 0.003   | 0.040 |
| SK-MEL-2                                            | 0.018   | 0.775   | 0.641 |
| Saos2                                               | 0.489   | 0.028   | 0.106 |
| <b>Super-long telomere length</b>                   |         |         |       |
| U2OS                                                | 0.000   | 0.000   | 0.000 |
| SK-MEL-2                                            | 0.007   | 0.004   | 0.000 |
| Saos2                                               | 0.042   | 0.031   | 0.010 |
| <b>Overall length coefficient of variation (CV)</b> |         |         |       |
| U2OS                                                | 0.000   | 0.000   | 0.000 |
| SK-MEL-2                                            | 0.000   | 0.000   | 0.000 |
| Saos2                                               | 0.000   | 0.020   | 0.000 |

| P values within ALT+ cell lines  |       |          |       |
|----------------------------------|-------|----------|-------|
|                                  | U2OS  | SK-MEL-2 | Saos2 |
| <b>ITS/Fusion %</b>              |       |          |       |
| U2OS                             | —     | 0.000    | 0.000 |
| SK-MEL-2                         | 0.000 | —        | 0.374 |
| Saos2                            | 0.000 | 0.374    | —     |
| <b>ITS+/Fusion %</b>             |       |          |       |
| U2OS                             | —     | 0.005    | 0.748 |
| SK-MEL-2                         | 0.005 | —        | 0.019 |
| Saos2                            | 0.748 | 0.019    | —     |
| <b>ITS-/Fusion %</b>             |       |          |       |
| U2OS                             | —     | 0.003    | 0.000 |
| SK-MEL-2                         | 0.003 | —        | 0.239 |
| Saos2                            | 0.000 | 0.239    | —     |
| <b>Telomere-free end (TFE) %</b> |       |          |       |
| U2OS                             | —     | 0.707    | 0.175 |
| SK-MEL-2                         | 0.707 | —        | 0.242 |
| Saos2                            | 0.175 | 0.242    | —     |
| <b>ITS+/Fusion mean length</b>   |       |          |       |
| U2OS                             | —     | 0.370    | 0.998 |
| SK-MEL-2                         | 0.370 | —        | 0.471 |
| Saos2                            | 0.998 | 0.471    | —     |
| <b>EndTel (-TFE) mean length</b> |       |          |       |
| U2OS                             | —     | 0.009    | 0.229 |
| SK-MEL-2                         | 0.009 | —        | 0.527 |
| Saos2                            | 0.229 | 0.527    | —     |
